# Supplementary material for: ELIFAN, an algorithm for the estimation of cloud cover from skyimagers
Source: Copernicus journal article supplement (doi:10.5194/amt-2018-452), 2019-02-04
Supplement: Supplementary file [file amt-2018-452-AC2-supplement.pdf]

## Referee #1

We deeply thank the reviewer for his/her comments and questions, which helped to improve the clarity of the manuscript.

Below are the responses to each of his/her comments.

**But first, note that the values of the evaluation in Table 4 have changed. We have found that at submission, we had not taken into account the most updated and optimized evaluation that had been previously done. This does not change any of the concluding messages in the article.**

[...] we have to be precise here: we are not talking about **clear sky** images but for **cloud-free** ones. Aerosols are not considered and the same stands for thin cirrus clouds.

→ **Yes, we understand. Although « clear sky » is quite generally used in the litterature, we agree that we rigorously should use « cloud free ». We made the changes accordingly.**

1. How the circumsolar area is selected?

→ **The sun mask diameter in pixels is a compromise between loosing some processed pixels (when we enlarge the sun mask), and increasing the difficulty/error (when we make its smaller, and so add impacted pixels).**

**We have specified this in the revised manuscript, in the description of step 2 page 8, lines 10-12.**

Is it always the same area around the Sun?

→ **yes. But when the sun is at the border (higher zenith angle), part of the mask gets outside the processed image. So it ends with a different portion of the total processed image.**

2. The cropped area does not refer only to obstacles (e.g. the building and the surroundings cover only a very small part of this area) but also to droplet area and clouds at high solar zenith angles.

This may improve the results a lot because this is the “difficult area” for cloud cover decision.

What is the percentage (relative to the total sky are) of the cropped area?

→ **The cropped area is fixed, and corresponds to an aperture angle of 143° centered toward zenith.**

**It avoids obstacles close to the image border, and also the sky close to horizon which can not be properly interpreted : a 4/8 cumulus field would be erroneously found 8/8 at horizon when counting the cloudy pixels of the image, because of this low elevation angle of view. It does not deal with cloud droplets.**

**We have specified the aperture angle of the cropped area in the revised version, page 7 line16.**

3. Please add more details in step 2 (page 9, lines 3-5). In order to put the solar mask on the image around the position of the Sun, you need some kind of geometric calibration.

→ **The solar zenith and azimuth angles are calculated from the method given by Reda, I., Andreas, A. (2003) : « Solar position algorithm for solar radiation application. National Renewable Energy Laboratory (NREL), Technical report NREL/TP-560-34302 ».**

If we write  $I_s, J_s$  the coordinates of the sun in the image (units = pixels) :

$$I_s = \text{Int} (A - B \sin (\alpha/2) \cos \beta)$$

$$J_s = \text{Int} (A - B \sin (\alpha/2) \sin \beta)$$

Where  $A$  and  $B$  are adjusted according to the camera ( $A$  is close to the diameter of the cropped image).

*This information has been added in the description of step2, page 8.*

The accuracy of this position is quite low though, of about  $5^\circ$ . Due to the large sun mask, it does not significantly impact on the results.

Nevertheless, we have now considered a more accurate positioning, based on Crispel and Roberts, 2018, and the Lambert projection for the representation function that takes account of the fish eye deformation. This leads to a calibrated fourth order polynomial for  $I_s$  and  $J_s$ . This will be implemented in the next version of ELIFAN. We added this information in the conclusion.

4. Page 9, line 16-17: it is mentioned that “if there are several reference images, the sky with the least turbidity is chosen as reference, based on the RBR pdf”.

If the other references images are not used, they have to be moved from the cloud free library before the classification.

The use of the image with the minimum turbidity cannot be considered as the most important one as it does not correspond to the “average” turbidity (or aerosol) conditions. It is exceptional for sure. So, another approach (e.g. an image selection for the “average” conditions) should be followed.

→ **Yes. It is true that using the image with the least turbidity may not be the most appropriate. We have now considered the possibility of using the image with the median amount of turbidity, among the set of reference images, for the next version of the algorithm. We mentioned this in the conclusion of the revised version.**

As an illustration, we show below a set of reference of cloud-free images with same zenith and azimuth angles. We can see here that there is not a very large spectrum of variability in this case of RAPACE camera images.

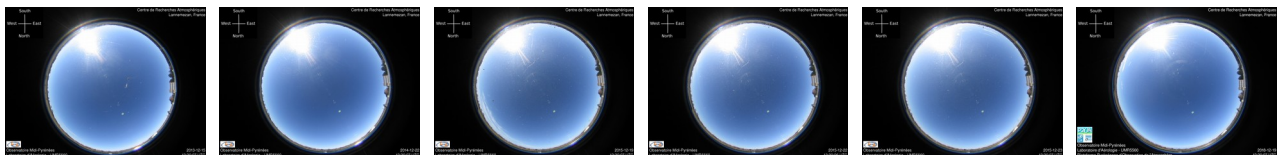

2013/12/15  
1330 UTC

2014/12/22  
1330 UTC

2015/12/19  
1330 UTC

2015/12/22  
1330 UTC

2017/12/25  
1330 UTC

2018/12/19  
1330 UTC

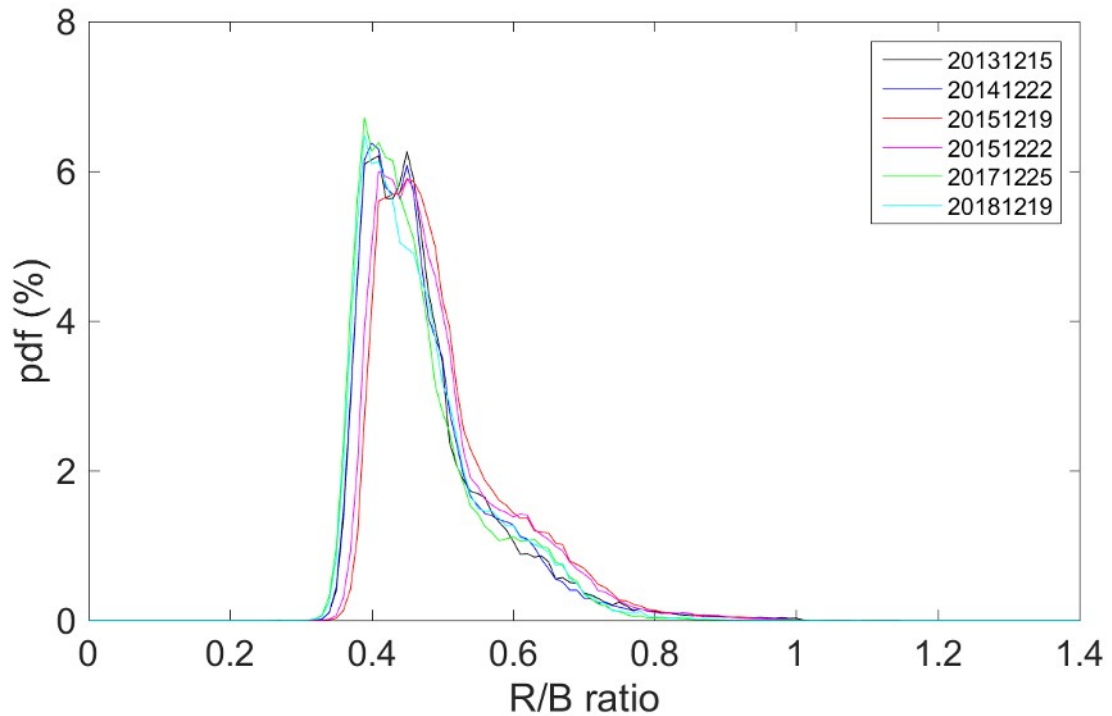

*PDF of the Red over Blue ratio for a set of reference images of same solar zenith and azimuth angle (see icones above).*

Below is an example of the result of the differential threshold process in the case of using the image with the least turbidity, versus using that of median turbidity, for an early June case. For the considered image, there are thin cirrus in the middle of the image, which can be more sensitive than other clouds to the library image used. But the difference between the two processes is small. The main difference is found around the sun mask. The difference in CF is of 4% in this example.

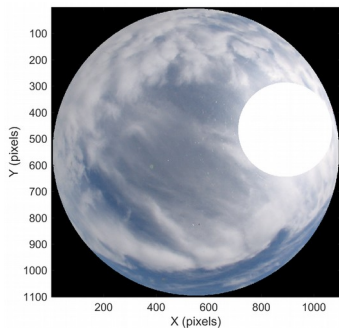

Cropped image  
2016/06/03  
0830 UTC

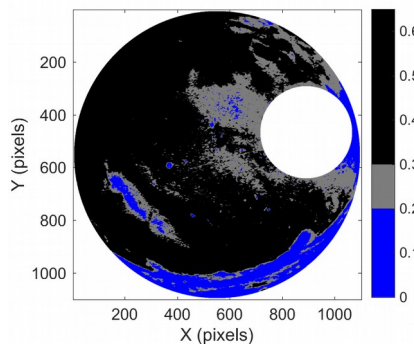

Differential process based on  
minimum turbidity reference  
image

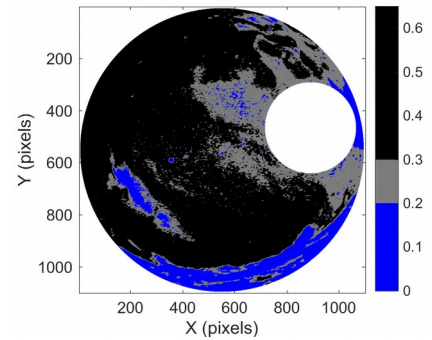

Differential process based on  
median turbidity reference  
image

5. Figure 5a: this is definitely not a cloud free image. It may be classified as cloud free but it is not and this should be discussed.

→ We agree that Image 5a should be changed. As an example of a cloud free image, with the corresponding pdf, we do need to give a better illustrating example.

We have now considered another time with a fully cloud-free image, as a better example. We also corrected an error on the year of the images, which was 2014 (not 2018).

Moreover, it is concluded later that the differential method is judged better than the absolute and definitely gives better results in detecting thin cirrus clouds (page 17, lines 10-14).

→ Yes, this was the result of a close look of the many images for evaluation, and sorted as a very general result. But the answer really depends on the conditions/images.

Below is an example (same as in question 4 above) with some thin cirrus clouds, which are quite extended in the middle of the image. Deeper Ci clouds surround them. The absolute threshold finds a large number of uncertain pixels within the thin cirrus clouds (see the area around X=400 and Y=600 in the middle panel figure below), while the absolute threshold process will consider them as clouds.

So if one wants to consider those clouds into the overall cloud cover, the differential process is doing relatively better here. While the amount of uncertain pixels in the absolute process gives an estimate of the thin cirrus cover.

Finally, one can also see in this example that in the circumsolar area, the absolute threshold gives better result in this area.

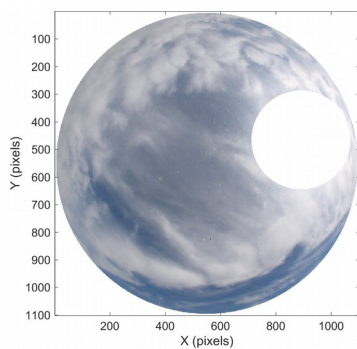

Cropped image  
2016/06/03  
0830 UTC

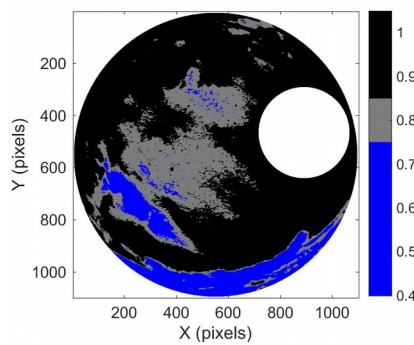

Absolute threshold process

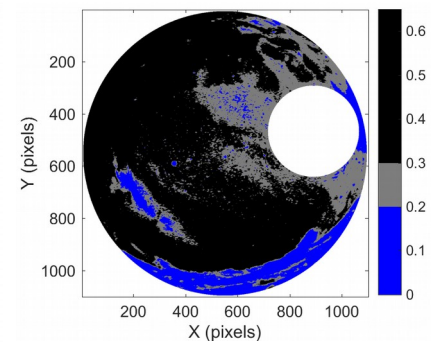

Differential threshold process

Below are 2 other examples of the impact of the circumsolar region.

One where the sun shines through a cloud-free area, and one where it is hidden by clouds.

In the first case, the use of the reference images makes a better interpretation of the circumsolar region. But in the second case, the effect is reverse, and the absolute process works better in this region. It also works generally better in detecting the cloud field of this image.

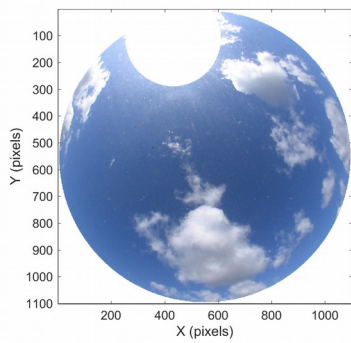

Cropped image  
2018/02/10  
1300 UTC

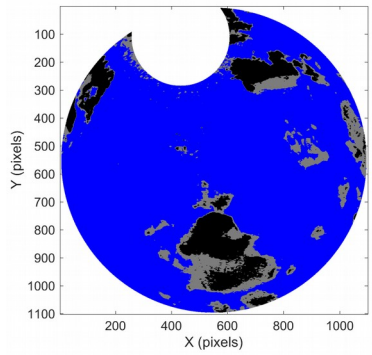

Absolute threshold process

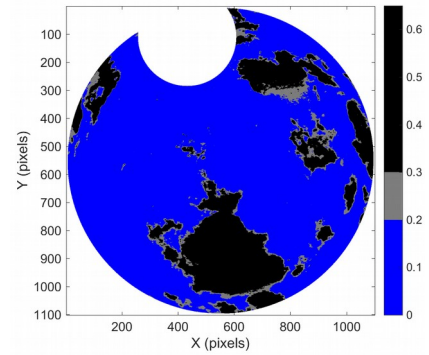

Differential process

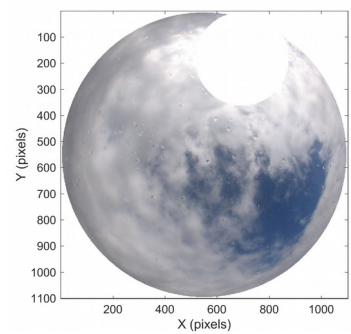

Cropped image  
2018/03/07  
1100 UTC

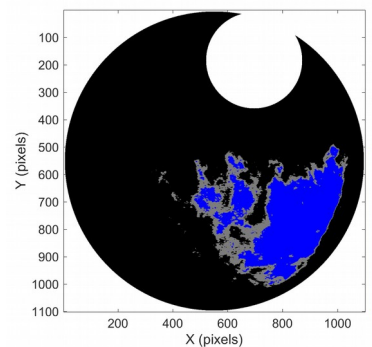

Absolute threshold process

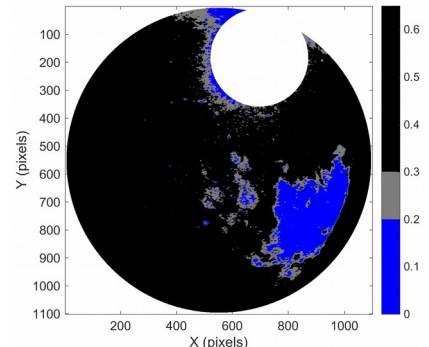

Differential process

**We have considered some of those examples in the revised version, in order to better illustrate the discussion on strength/weakness of ELIFAN, and the different results of both processes (see page 16 , lines 17-28).**

So, why you do not use the differential method instead of the absolute also here for the categorization of such a type of images?

→ **The library images are by construction not identified by the differential method.**

**But, it happens that the reference images are not absolutely fully cloud-free, like this fig 5a, and 6b.**

**This is inherent of ELIFAN : once in the library, the image is not processed by the absolute process, since it has already been evaluated as a fully clear-sky image (see the organigramme of Fig.4 in the manuscript).**

6. Page 12, line 20: it is not clear if the method is dependent for solar zenith angle. The images in figure 3 correspond almost to the same solar zenith angle. What about a set of images at a lower solar zenith angle? Are the same thresholds valid?

→ **Yes, the same criteria are valid along the day. We have made this clearer in the text page 11 line 19.**

Moreover, it is very common that the RBR values change among different cameras. Apart from the

distribution of RBR, which is the effect on RBR threshold values?

→ This is correct. One needs to adapt the thresholds to the different cameras (see Table 3), due to this effect.

For some systems that would generate images that are significantly different from an EKO or RAPACE system, it might be more difficult to find appropriate thresholds (systems with more contribution of the red color for example). In that case (not encountered here), one possibility may be to first apply a filter to the image in order to adapt the RBR pdf back into a similar range and variability than other cameras.

7. Page 12, lines 22-23: Why do you choose now the pixel by pixel process but not in the previous step?

→ An image is first evaluated at step 3 from its RBR pdf : we evaluate whether it is a fully cloudy or a fully cloud-free image. Only afterward, is the image evaluated on a pixel-by-pixel point of view, by the differential or absolute processes. Those processes are appropriate for images that have a mix of cloudy and clear-sky pixels.

That was initially explained in the manuscript. See page 10, lines 2-4 : « In step 3, the principle is to consider the cropped image as a whole, and detect whether it is a fully cloudy sky image, a fully cloud free image, or neither of those two (i. e. a partly cloudy image). This step is based on the RBR distribution of the entire ensemble of pixels. » It is also clear from the organigramme in Figure 4.

In this way, some cloudy areas (e.g. in figure 5a) could be removed from the “cloud-free” image. 8.

Figure 6 and relevant text: The sky image in figure 6b has been detected as partly cloudy.

→ Yes, this happens about 17% of the time (outside the sunrise/sunset period). Those failing library images show only very small and/or thin clouds, which can have an impact of a few % in the final cloud cover estimate (no impact in the case shown though). It is an illustration of the limitation/weakness of the library. However, a discussion about this definitely lacked in the initial manuscript. We added some comments page 12, lines 15-17 ; page 16, lines 12-15.

(8) However, it is almost identical with the image 5a.

Which is the pdf versus RBR for the 6b image?

→ The pdf of Fig. 6b is shown below (left panel), compared to the former Fig.5a (middle panel) and the new Fig.5a (right panel).

One can see how a fully cloud-free image has only one mode in the pdf, toward the small values of the RBR. When there are some small clouds, a secondary small mode may appear, which is not obvious in the case of Fig. 6b.

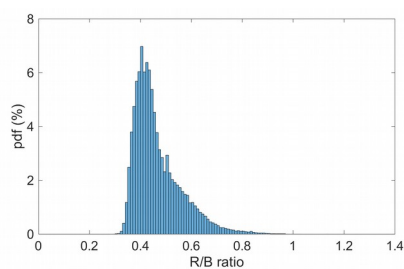

RBR pdf of Fig. 6b

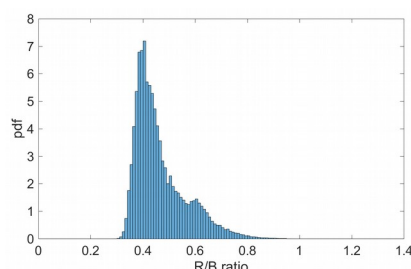

RBR pdf of Former Fig. 5a

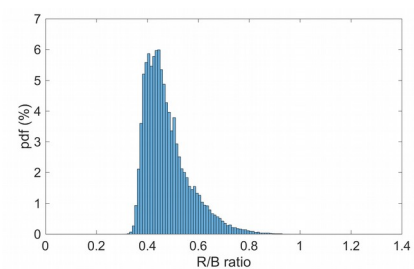

RBR pdf of New Fig. 5a

This example questions strongly the robustness of the cloud-free image selection method.

→ **We agree that the cloud-free images selection method is not perfect. Those examples illustrate the limitation of the library. We also have clearly exposed this limitation in section 3.4 and Table 4. 17 % of the library images have such a thin and small (or tiny) cloud in the field, rather than being perfectly cloud-free. But those correspond to a maximum of a few percent in the final amount of cloud cover, which remains acceptable for our purpose. We added more discussion in the final conclusion about this aspect.**

9. Table 3 and relevant text: the EKO camera at P2OA presents different Tclear and Tcloudy values when compared to those at SIRTa and CO-PDD.

Please explain the differences taking into account that the cropped radii are different.

→ **The different cropped radii comes from the different size image (Table 1). The twice bigger image of the P2OA EKO camera leads to a twice bigger radius of the cropped image. But this has no influence on the R/B thresholds.**

**This is more likely due to the altitude of the P2OA EKO (2877 m asl), associated with less aerosols, which shifts the cloud-free image pdf toward smaller RBR values.**

**We have added this comment on this in the revised version, page 14, lines 17-19.**

10. Page 17, line 20: the hours between 9 and 15UT correspond to which solar zenith angles in summer and winter time?

→ **The hours between 0900 and 1500 UTC correspond to minimum and maximum zenith angle of 20° and 42° respectively in Summer, and 66° and 78° respectively in winter.**

How this is related to the cropped sky area?

→ **The consequence of the summer/winter difference here is that the sun mask is entirely included in the cropped image of summer time (it corresponds to 10 % of the cropped image), but only 30 % (0900 or 1500 UTC) to 60 % (1200 UTC) of it is included in the cropped image during the smallest day of winter (which corresponds to 3 % to 6 % of the processed image respectively).**

**But this should not have a strong impact on the CF\_diff versus CF\_abs comparison.**

**We have added a comment on this aspect in the revised version page 18, lines 6-8.**

11. Section 4: It is good to know that an all-sky imager could provide useful information for cloudiness at any measuring site. It also explains much of the measured variability of surface irradiance. This seems to be a nice paragraph promoting all-sky imagers but it does not enhance the validity of the algorithm.

Moreover, the fact that an all-sky imager, compared to a ceilometer, could provide a holistic information for cloud cover (but not for cloud height) is totally expected.

→ **We fully agree with this.**

It is not clear what is the purpose of section 4, it may be removed.

→ **This question was also raised by Rev #2.**

**The main goal was to illustrate the algorithm process presented before, and discuss it with other points of view brought by complementary instruments.**

**Which eventually gives 2 objectives :**

**(1) illustrating the ELIFAN process and weakness/strength points presented before**

**(2) showing the complementarity of the instruments.**

**We thought that this section would be useful for readers who are interested in the application of the sky cameras.**

**But, based on the fact that :**

- both Reviewer #1 and Reviewer #2 have put this section into question,
  - we have inserted more illustrations of the strength and limitations of ELIFAN in section 3,
  - it is appropriate to keep the manuscript to a reasonable length,
- we propose to remove this section.**

**With this change, the previous evaluation section 3.4 has now been renamed section 4 itself, in order to better balance the size of the various parts of the revised article.**

**However, we are still willing to keep the original section 4 if ever the Reviewers and Editor finally find it more appropriate.**

12. Based on the above comments, the abstract and conclusion paragraphs should be revised.

→ **We have revised the abstract and conclusion accordingly.**

Minor comments: Page 9, line 4: the solar mask (instead of maks)

Figure 3: please align horizontally the 2 images

Figure 5: please check again the y axis title in figures d,e,f.

**We made those changes as suggested.**
